# Supplementary material for: Differentiation of disaccharide isomers via diagnostic-ion-weighted spectral library searching using data from tandem MS analysis of chloride adducts
Source: Royal Society of Chemistry journal article supplement (doi:10.1039/d6an00268d), 2026-04-30
Supplement: d6an00268d1.pdf [file d6an00268d1.pdf]

**SUPPORTING INFORMATION**

**Differentiation of Disaccharide Isomers via Diagnostic-Ion-Weighted Spectral  
Library Searching using Data from Tandem MS Analysis of Chloride  
Adducts**

*Shixiang Xu, Santosh R. Acharya, Ruth M. Speidel, and Abraham K. Badu-Tawiah\**

Department of Chemistry and Biochemistry, The Ohio State University, Columbus, OH 43210, USA

\*Correspondence to Dr. Abraham K. Badu-Tawiah

100 W. 18<sup>th</sup> Avenue, Columbus OH, 43210

Email : badu-tawiah.1@osu.edu

Tel. : 614-292-4276

Fax : (614) 292-1685

Table of Contents

|                                                                                                                |           |
|----------------------------------------------------------------------------------------------------------------|-----------|
| <b>1. User interface of a MySQL 8.0.43 .....</b>                                                               | <b>3</b>  |
| <b>2. Full MS in Negative Chloride Adducted Mode .....</b>                                                     | <b>4</b>  |
| <b>3. Fragmentation Patterns of Negative Chloride Adducted Disaccharides .... Error! Bookmark not defined.</b> |           |
| <b>4. Tandem Mass Spectra of Negative Chloride–Adducted Disaccharide Isomers.....</b>                          | <b>5</b>  |
| <b>5. Within-run relative standard deviation (RSD) of triplicate measurements.....</b>                         | <b>8</b>  |
| <b>6. Isomer with different compositions and configuration.....</b>                                            | <b>9</b>  |
| <b>7. Binary Sample Analysis with Diagnostic Ions .....</b>                                                    | <b>10</b> |
| <b>8. Binary Sample Analysis without Diagnostic Ions .....</b>                                                 | <b>11</b> |
| <b>9. MS/MS spectra of chloride-adducted ions in negative-mode analysis of real samples.....</b>               | <b>12</b> |

## 1. User Interface of a MySQL 8.0.43

All 15 disaccharide isomers were analyzed by MS/MS in negative-ion mode using chloride adducted ions. The resulting spectra were converted to mzML format and subsequently uploaded to a MySQL database. Each isomer was acquired in triplicate, with a one-minute acquisition time per run. All runs were performed at 30% collision-induced dissociation (CID) energy and stored as tables within the disaccharide scheme. For each isomer, the corresponding table contains m/z values, signal intensities, and the assigned set of diagnostic fragment ions.

The selected saccharide isomer contains data on m/z, signal intensity, and diagnostic fragment ions.

| moverz  | signal_intensity | diagnose_ion_moverz | number_index |
|---------|------------------|---------------------|--------------|
| 0       | 0                | 115                 | 1            |
| 100.748 | 0.0391129        | 215                 | 2            |
| 0       | 0                | 263                 | 3            |
| 0       | 0                | 221                 | 4            |
| 0       | 0                | 245                 | 5            |
| 0       | 0                | 0                   | 6            |
| 0       | 0                | 0                   | 7            |
| 0       | 0                | 0                   | 8            |
| 0       | 0                | 0                   | 9            |
| 0       | 0                | 0                   | 10           |
| 0       | 0                | 0                   | 11           |
| 0       | 0                | 0                   | 12           |
| 0       | 0                | 0                   | 13           |
| 0       | 0                | 0                   | 14           |

**Figure S1.** User interface utilizing MySQL 8.0.43 for spectral library storage platform containing m/z values, intensities, and diagnostic fragment ions.

## 2. Full MS in Negative Chloride Adducted Mode

The full MS spectra of each disaccharide isomer was acquired in negative-ion mode, utilizing chloride adduction. An example spectrum is shown below for lactose (MW 365 Da), where the chloride adduct appears at  $m/z$  377, corresponding to the  $[M+^{35}\text{Cl}]^-$ . The chloride-37 isotopic adduct is also observed at  $m/z$  379. The relative signal intensities of these two peaks exhibit the expected  $\sim 3:1$  isotopic abundance ratio.

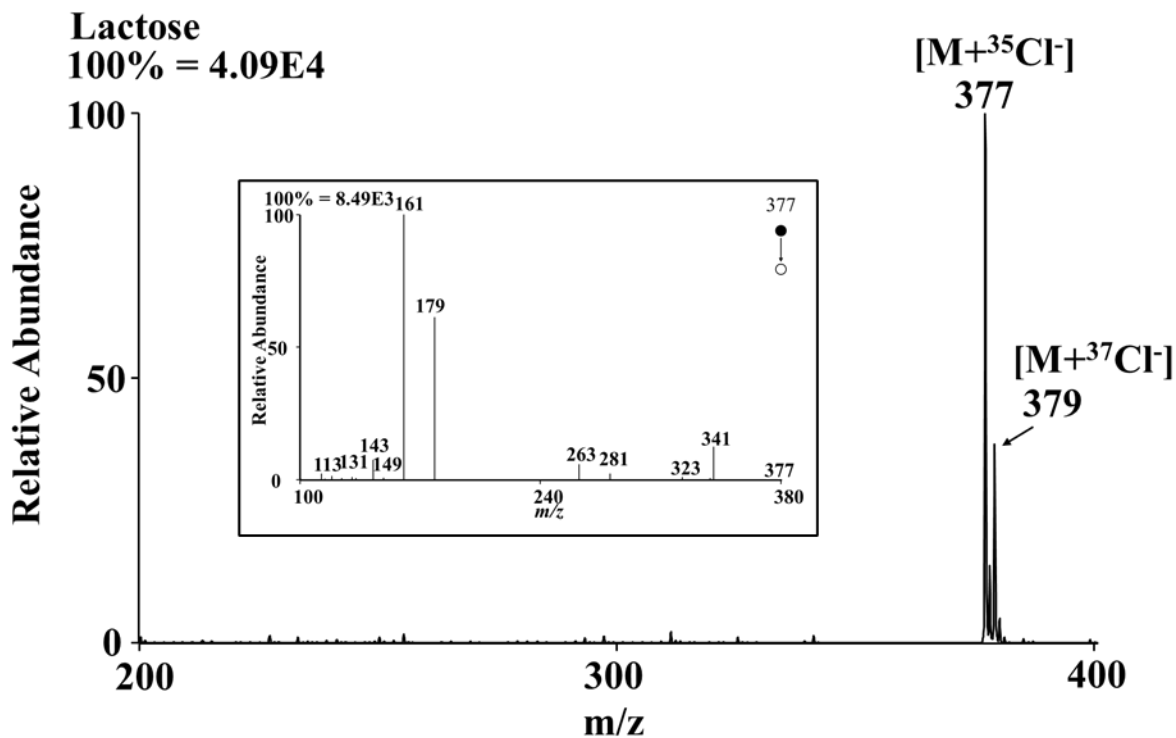

**Figure S2.** Full MS analysis of lactose in negative-ion mode via chloride adduction using nESI. Inset shows MS/MS analysis of the peak at  $m/z$  377. Inset shows MS/MS at  $m/z$  377.

### 3. Tandem Mass Spectra of Negative Chloride-Adducted Disaccharide Isomers

The tandem mass spectra for all disaccharide isomers analyzed in negative-ion mode via CID of the chloride adduct are shown below. All disaccharides were isolated at  $m/z$  377 using an isolation width of  $m/z$  1. The fragment ions can be traced through the various fragmentation pathways described in Figure S3 above.

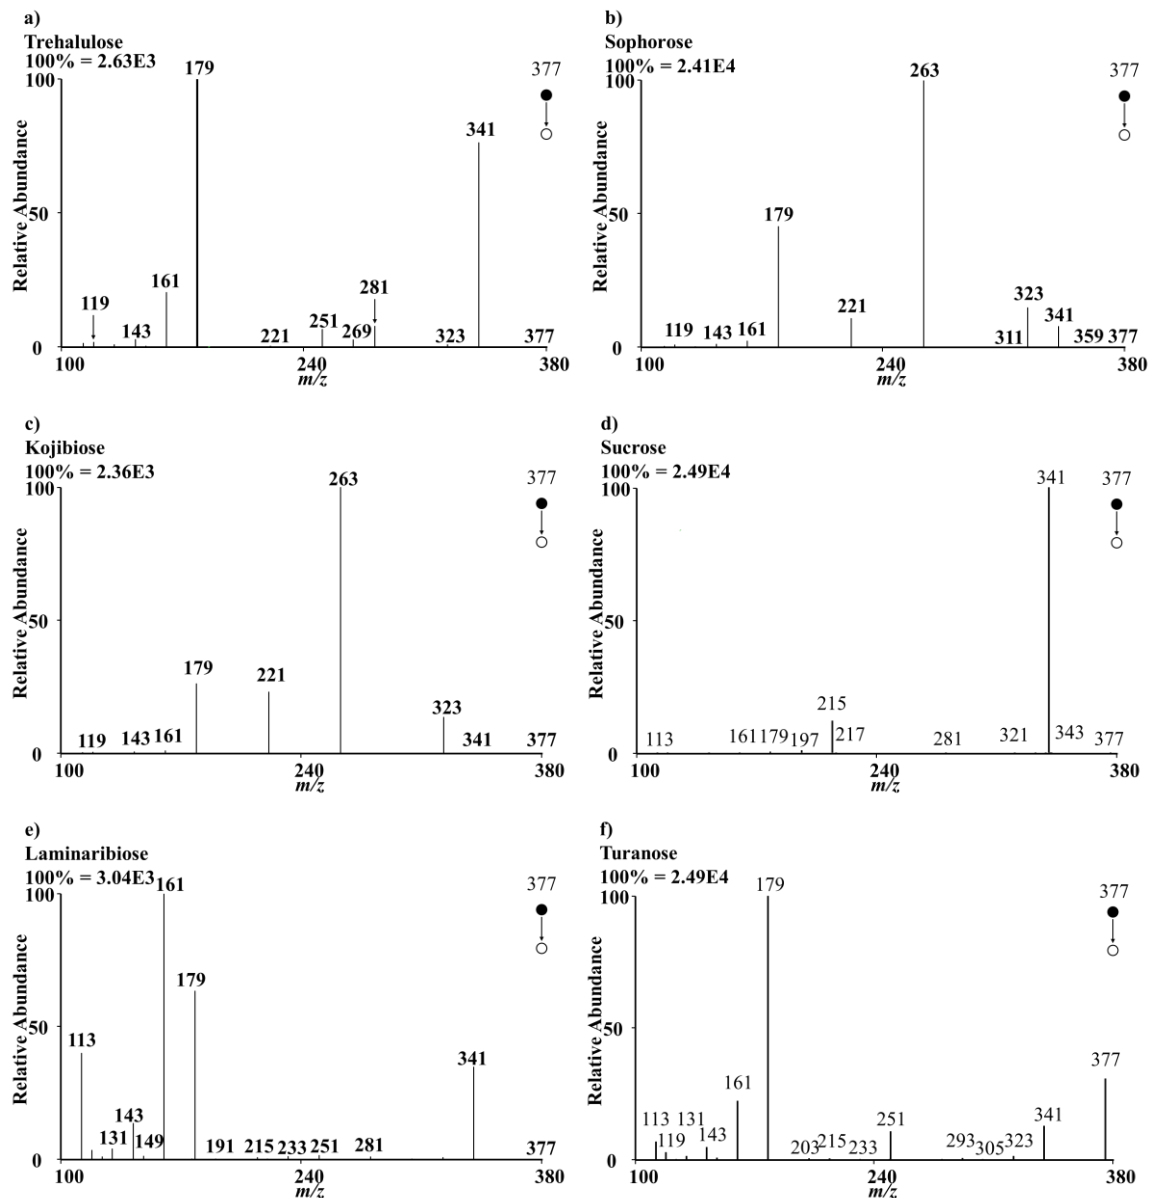

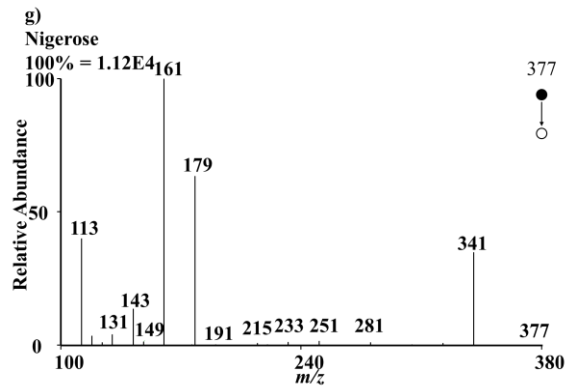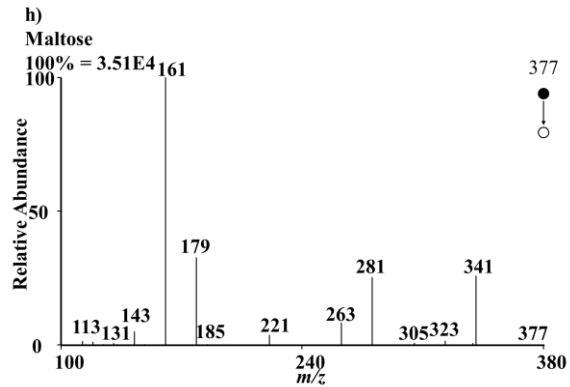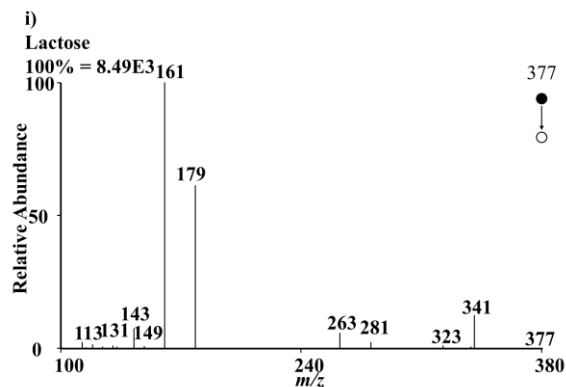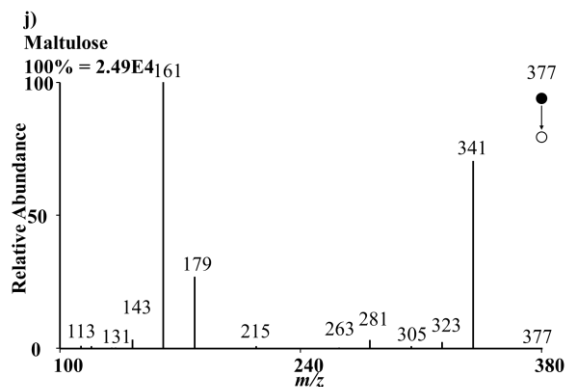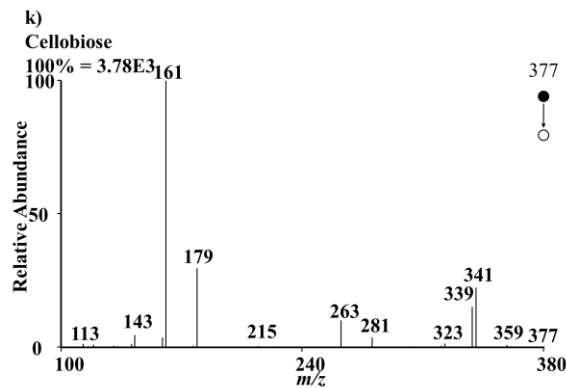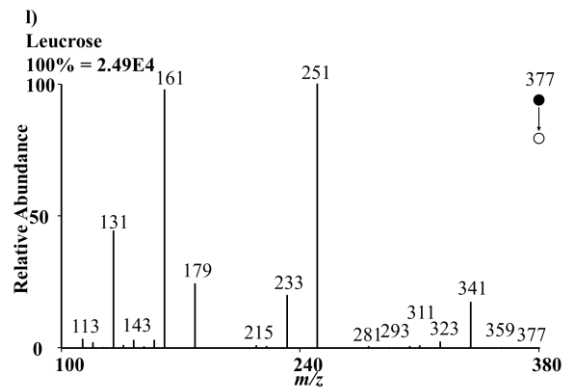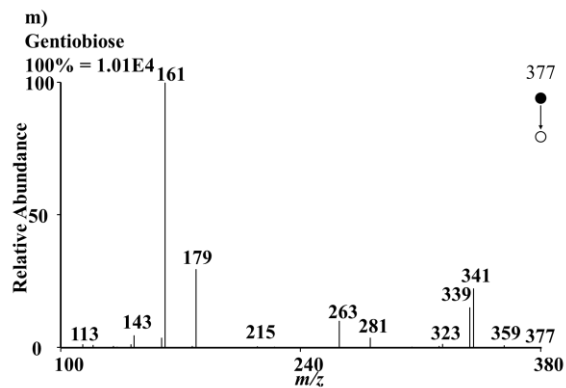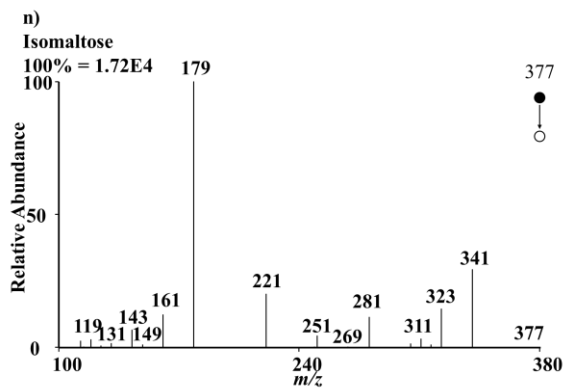

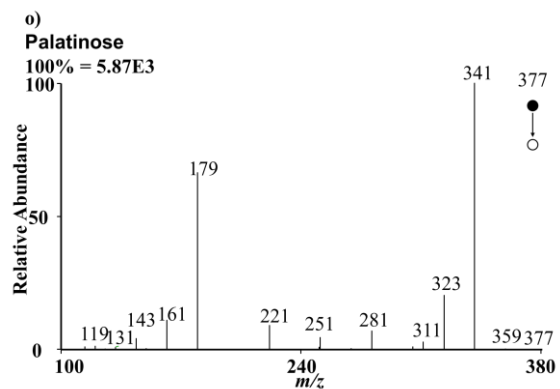

**Figure S3.** Individual MS/MS for **a)** Trehalose **b)** Sophorose **c)** Kojibiose **d)** Sucrose **e)** Laminaribiose **f)** Turanose **g)** Nigerose **h)** Maltose **i)** Lactose **j)** Maltulose **k)** Cellobiose **l)** Leucrose **m)** Gentiobiose **n)** Isomaltose **o)** Palatinose each at concentration of 20  $\mu$ M.

#### 4. Relative standard deviation (RSD)

To evaluate reproducibility and method stability, relative standard deviation (RSD) analysis was performed on the diagnostic-ion-weighted score ( $S_D$ ) value of each isomer against the reference library. The RSD analysis was conducted using three independent replicate analysis. The results show that all RSD values were below 30%, indicating that the method characterizes saccharide isomer with good precision and reproducibility.

|                   |                   |             |           |           |         |          |         |           |          |            |               |          |         |            |            |            |
|-------------------|-------------------|-------------|-----------|-----------|---------|----------|---------|-----------|----------|------------|---------------|----------|---------|------------|------------|------------|
| Reference Library | trehalulose       | 0.00        | 0.01      | 7.22      | 0.07    | 0.02     | 13.18   | 0.17      | 0.29     | 29.99      | 0.17          | 0.17     | 0.23    | 0.33       | 9.69       | 0.06       |
|                   | sophorose         | 6.52        | 0.01      | 0.14      | 1.80    | 1.79     | 3.95    | 14.52     | 4.88     | 10.39      | 4.54          | 5.29     | 0.72    | 0.46       | 3.13       | 2.91       |
|                   | kojibiose         | 0.06        | 0.01      | 0.01      | 2.19    | 0.19     | 0.14    | 0.11      | 0.28     | 0.07       | 0.19          | 0.16     | 0.20    | 0.15       | 0.15       | 0.16       |
|                   | sucrose           | 0.25        | 0.00      | 0.81      | 0.00    | 1.45     | 0.30    | 0.09      | 0.35     | 0.12       | 0.39          | 0.32     | 0.77    | 0.31       | 0.01       | 0.63       |
|                   | turanose          | 0.07        | 0.08      | 0.22      | 0.73    | 0.00     | 0.14    | 0.23      | 0.09     | 0.11       | 0.14          | 0.14     | 0.16    | 0.23       | 0.07       | 0.06       |
|                   | maltose           | 0.14        | 0.33      | 22.31     | 0.09    | 0.17     | 2.43    | 0.03      | 0.04     | 0.12       | 0.01          | 0.00     | 0.01    | 0.03       | 0.19       | 0.22       |
|                   | maltulose         | 0.09        | 0.44      | 1.05      | 0.37    | 0.35     | 0.21    | 0.00      | 0.05     | 0.14       | 0.11          | 0.10     | 0.16    | 0.14       | 0.46       | 0.24       |
|                   | leucrose          | 5.44        | 0.05      | 0.21      | 0.85    | 0.13     | 0.12    | 0.05      | 23.79    | 4.86       | 0.12          | 0.11     | 0.14    | 0.12       | 0.12       | 0.17       |
|                   | palatinose        | 0.13        | 0.36      | 0.30      | 0.28    | 0.46     | 9.75    | 0.03      | 0.50     | 0.02       | 0.30          | 5.78     | 0.46    | 0.21       | 0.31       | 0.32       |
|                   | laminaribiose     | 0.77        | 0.93      | 0.93      | 0.39    | 0.72     | 0.13    | 0.00      | 0.61     | 0.63       | 0.01          | 0.03     | 0.13    | 0.07       | 0.82       | 0.83       |
|                   | nigerose          | 13.93       | 0.30      | 6.93      | 1.11    | 2.71     | 3.75    | 0.09      | 0.99     | 23.79      | 0.01          | 4.68     | 0.08    | 0.08       | 7.04       | 6.69       |
|                   | lactose           | 0.20        | 0.44      | 13.58     | 2.68    | 0.39     | 0.05    | 0.25      | 0.04     | 0.10       | 0.03          | 0.05     | 0.02    | 0.12       | 0.30       | 0.46       |
|                   | cellobiose        | 0.29        | 1.02      | 1.18      | 0.71    | 0.16     | 0.33    | 0.08      | 0.13     | 0.39       | 0.03          | 0.03     | 0.01    | 0.05       | 0.22       | 0.23       |
|                   | gentibiose        | 0.25        | 0.13      | 0.35      | 1.62    | 0.20     | 1.23    | 0.88      | 3.58     | 0.40       | 0.34          | 0.34     | 0.31    | 0.67       | 0.01       | 0.08       |
|                   | isomaltose        | 0.01        | 0.03      | 0.05      | 0.03    | 0.00     | 0.09    | 0.07      | 0.11     | 0.03       | 0.03          | 0.04     | 0.06    | 0.10       | 0.01       | 0.01       |
|                   |                   | trehalulose | sophorose | kojibiose | sucrose | turanose | maltose | maltulose | leucrose | palatinose | laminaribiose | nigerose | lactose | cellobiose | gentibiose | isomaltose |
|                   | Unknown Compounds |             |           |           |         |          |         |           |          |            |               |          |         |            |            |            |

**Figure S4.** Relative standard deviation (RSD) of triplicate measurements for different disaccharide isomers, provided in percentages (%).

## 5. Isomer with different compositions and configuration

The isomers with identical linkage position are most likely to yield similar MS/MS spectra. This similarity is primarily due to shared intermediate formed during the collisional induced dissociation (CID). As shown in the figures below, for the (1→2) linkage, kojibiose and sophorose generate common intermediate fragments, with difference arising from the configuration of glycosidic bonds ( $\alpha$  versus  $\beta$ ).

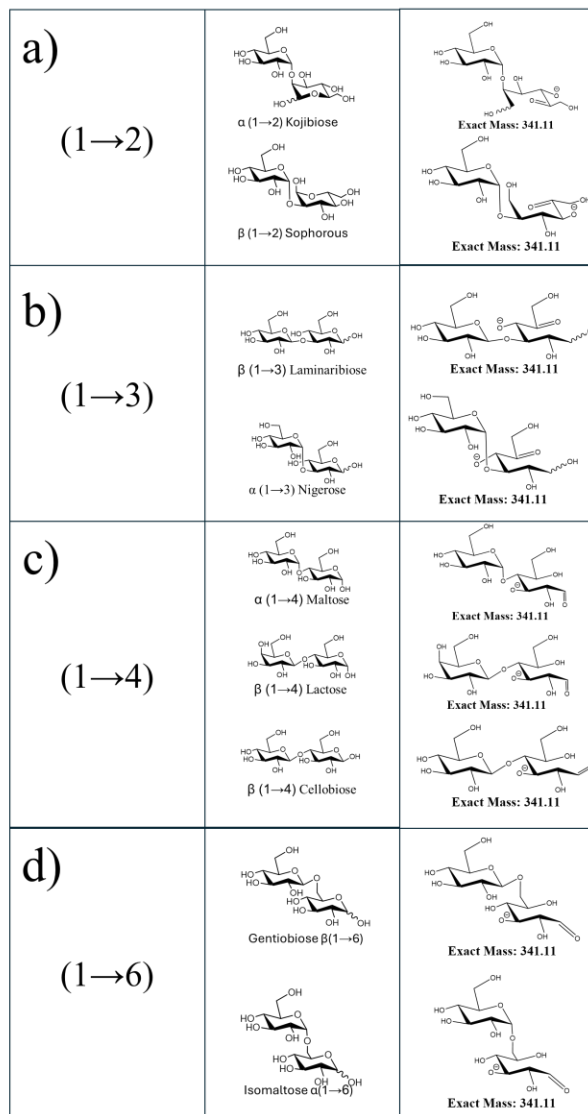

**Figure S5.** Same linkage isomers can yield shared CID intermediates. (a) 1→2 linkage: kojibiose vs. sophorose (b) 1→3 linkage: laminaribiose vs. nigerose (c) 1→4 linkage: maltose, lactose, and cellobiose (d) 1→6 linkage: isomaltose vs. gentiobiose.

## 6. Binary Sample Analysis with Diagnostic Ions

We prepared 53 different binary mixture samples to evaluate the ability of diagnostic-ion-weighted algorithm to identify the correct isomers in a binary mixture.

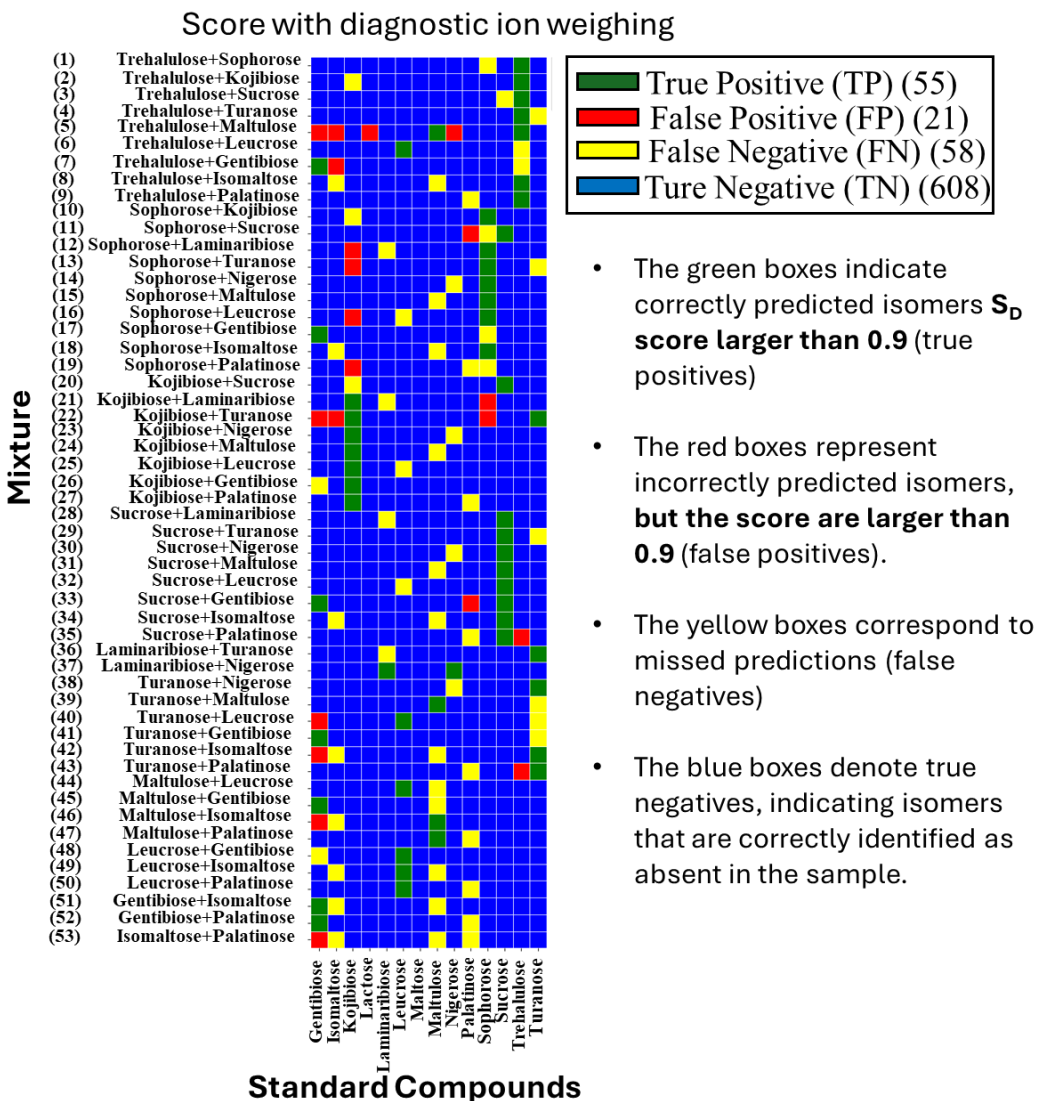

**Figure S6.** Binary sample analysis using diagnostic-ion-weighted scoring algorithm. Green indicates true positives with the  $S_D$  score exceeding 0.9, red indicates false positives, yellow indicates false negatives, and blue represents true negatives.

## 7. Binary Sample Analysis without Diagnostic Ions

We prepared 53 different binary mixture samples to evaluate the ability of conventional scoring algorithms to identify the correct isomers in a binary mixture.

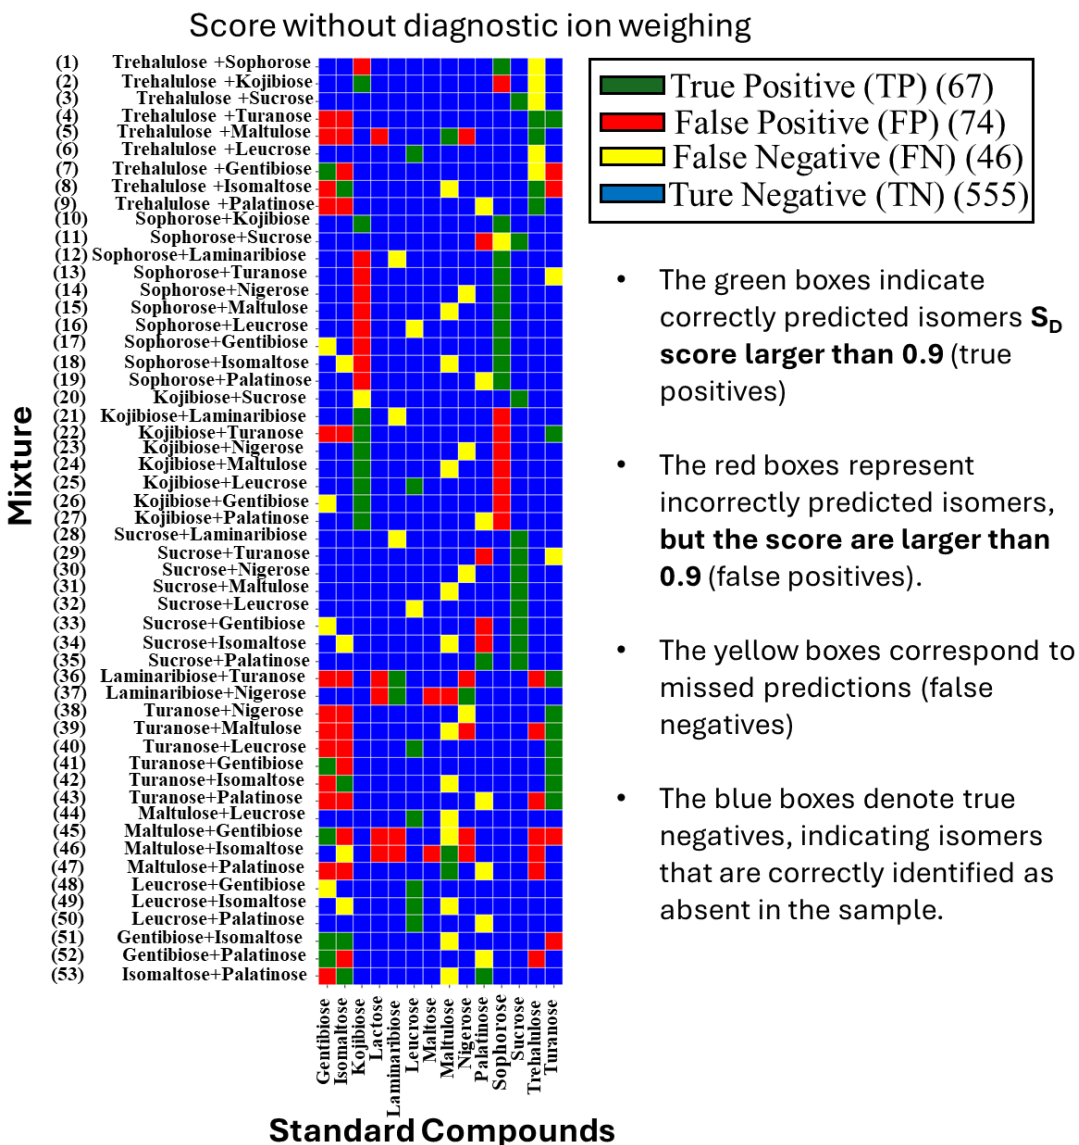

**Figure S7.** Binary sample analysis without using diagnostic-ion-weighted scoring algorithm. Green indicates true positives with the  $S_D$  score exceeding 0.9, red indicates false positives, yellow indicates false negatives, and blue represents true negatives.

## 8. MS/MS spectra of real samples: apple juice, coca cola, and beer.

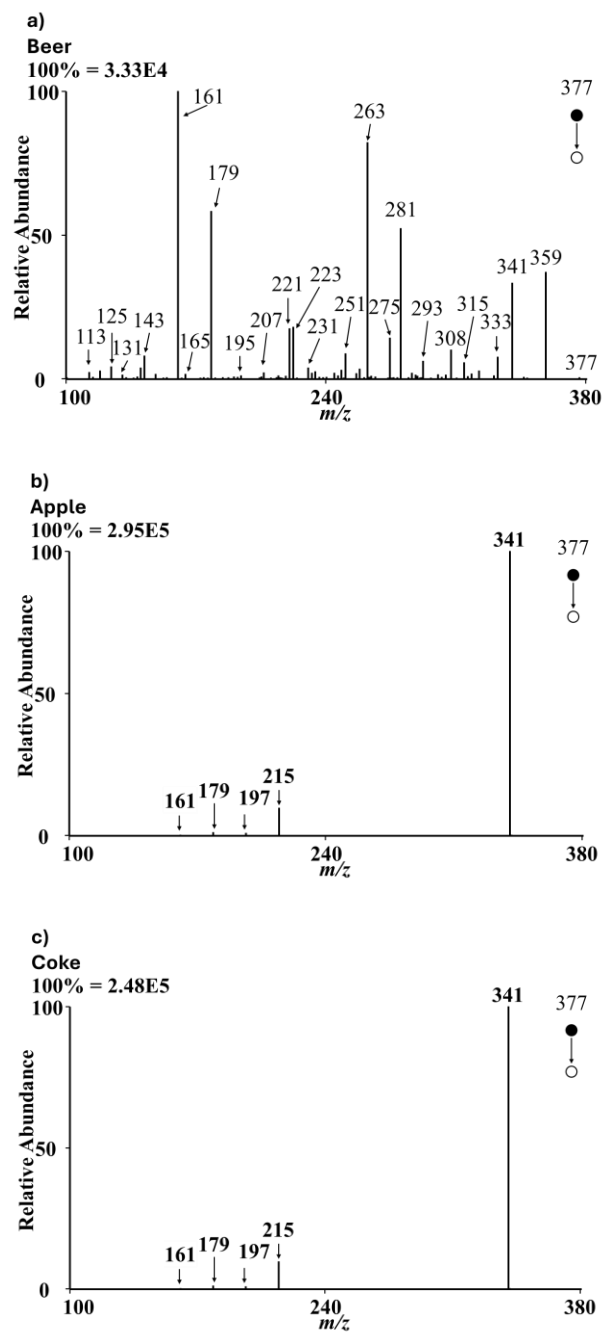

**Figure S8.** Individual negative-mode MS/MS spectra of chloride-adducted ions from real samples: (a) beer, (b) apple, and (c) Coke.
